# Supplementary material for: Electrocatalytic reduction of low concentration CO2
Source: PubMed Central journal article supplement — Chem Sci. 2018 Nov 12;10(6):1597–606. doi: 10.1039/c8sc04124e (PMC6368209; doi:10.1039/c8sc04124e), 2018-11-12
Supplement: SC-010-C8SC04124E-s001.pdf [file SC-010-C8SC04124E-s001.pdf]

## Supporting Information

### Electrocatalytic Reduction of Low Concentration CO<sub>2</sub>

*Hiromu Kumagai, Tetsuya Nishikawa, Hiroki Koizumi, Taiki Yatsu, Go Sahara, Yasuomi Yamazaki, Yusuke Tamaki, and Osamu Ishitani\**

*Department of Chemistry, School of Science, Tokyo Institute of Technology, O-okayama 2-12-1-NE-1, Meguro-ku, Tokyo 152-8550, Japan*

\*Corresponding author: [ishitani@chem.titech.ac.jp](mailto:ishitani@chem.titech.ac.jp)

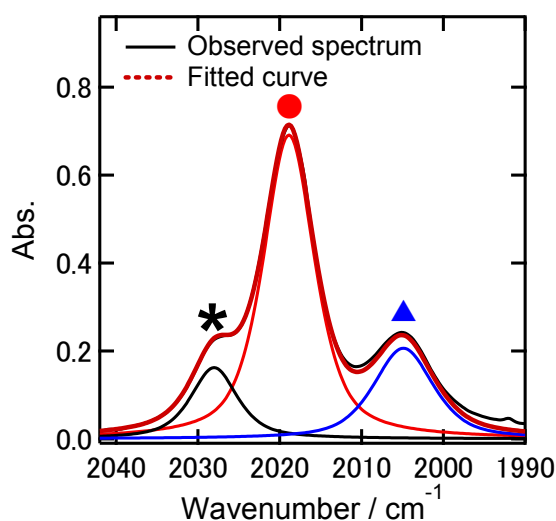

**Fig. S1.** Curve fitting of the FT-IR spectrum of the Re(I) complexes (5.0 mM) in a DMF-TEOA (5:1 v/v) solution containing 0.1 M Et<sub>4</sub>NBF<sub>4</sub> after purging with 1% CO<sub>2</sub>. Black asterisk (\*), blue triangle (▲) and red circle (●) display the peaks attributed to **Re-DMF<sup>+</sup>**, **Re-TEOA**, and **Re-CO<sub>2</sub>TEOA**, respectively.

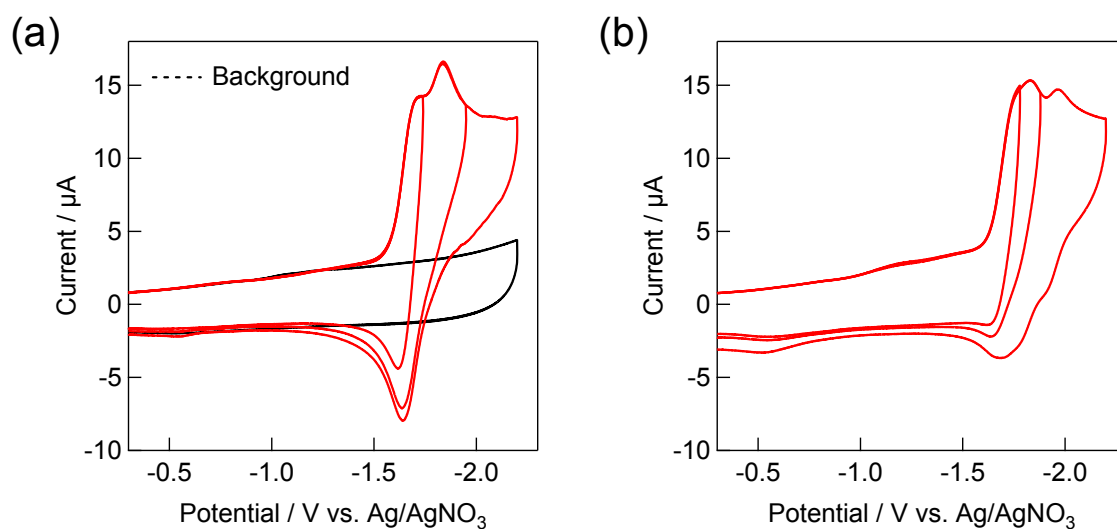

**Fig. S2.** CVs of the  $\text{Re}(\text{I})$  complex (0.5 mM) in DMF (a) and in a DMF-TEOA mixed solution (5:1 v/v) (b) containing  $\text{Et}_4\text{NBF}_4$  (0.1 M) as supporting electrolyte under an Ar atmosphere at a sweep rate of  $200 \text{ mV s}^{-1}$ . A glassy carbon electrode (diameter: 3 mm), a  $\text{Ag}/\text{AgNO}_3$  (10 mM) electrode and a Pt wire were used as working, reference, and counter electrode, respectively.

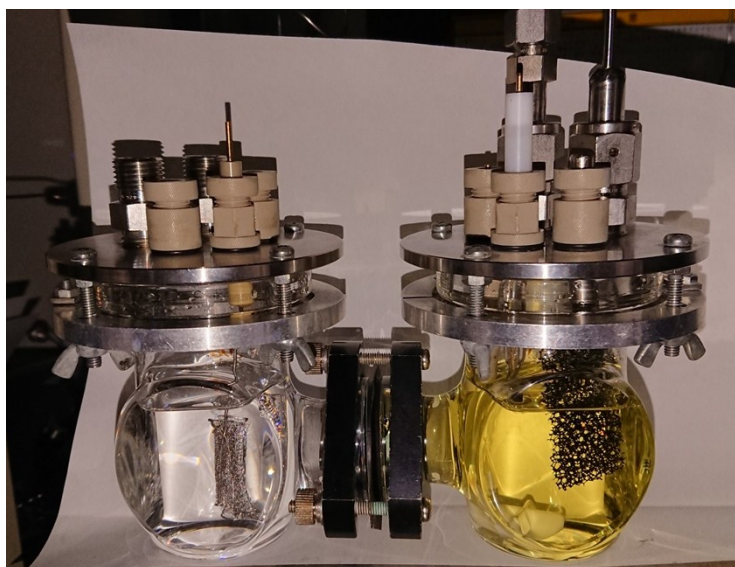

**Fig. S3.** Picture of the setup for the bulk electrolysis. The right side is the cathodic chamber for  $\text{CO}_2$  reduction reaction.

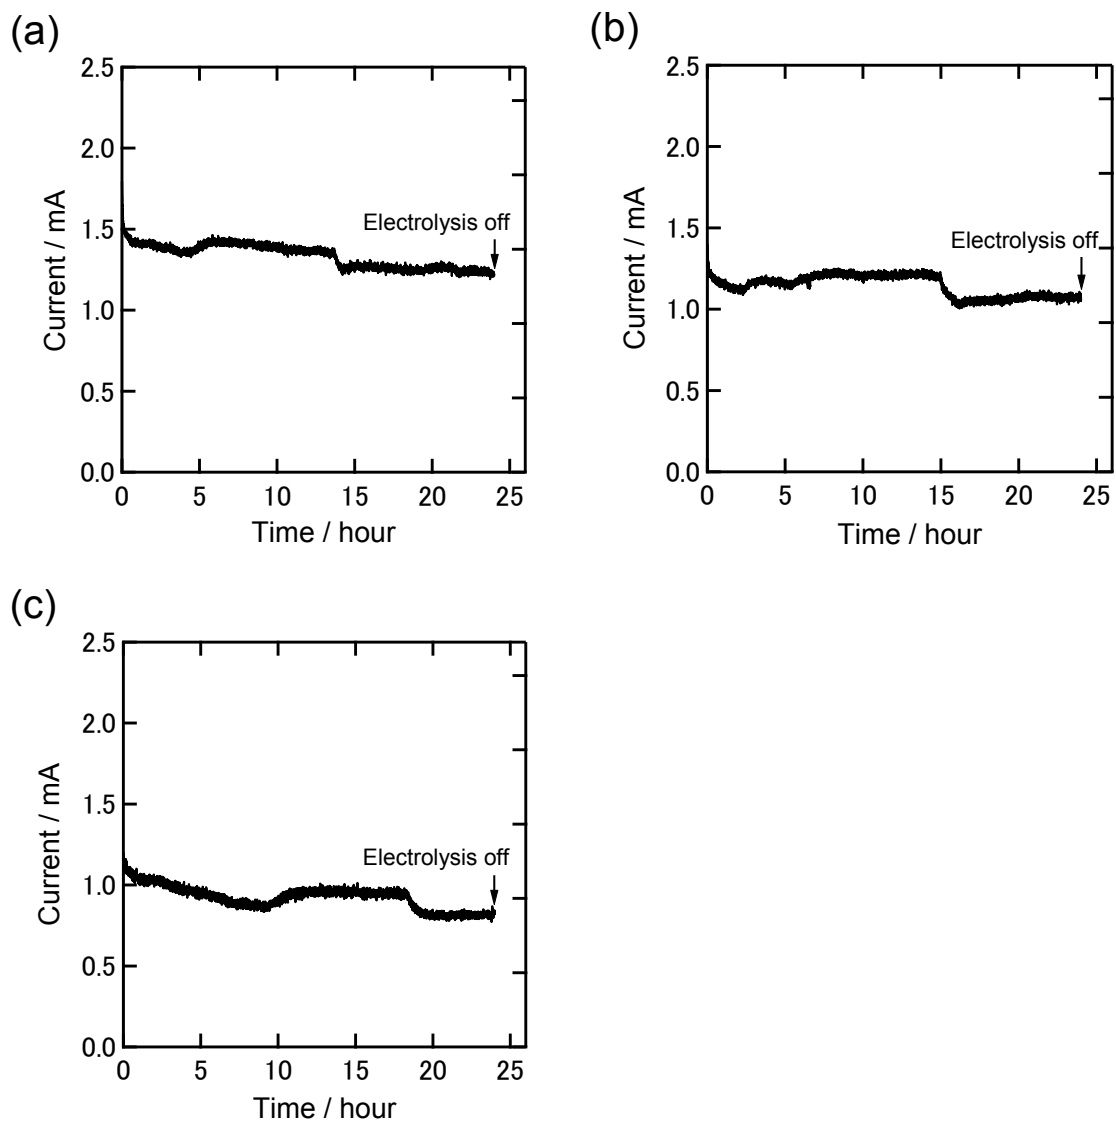

**Fig. S4.** Time courses of current during bulk electrolysis using the Re(I) catalyst (0.5 mM) at  $-1.82$  V in a DMF-TEOA solution containing  $\text{Et}_4\text{NBF}_4$  (0.1 M) under (a) 100%, (b) 10%, and (c) 1%  $\text{CO}_2$  atmospheres ( $10 \text{ mL min}^{-1}$ ).

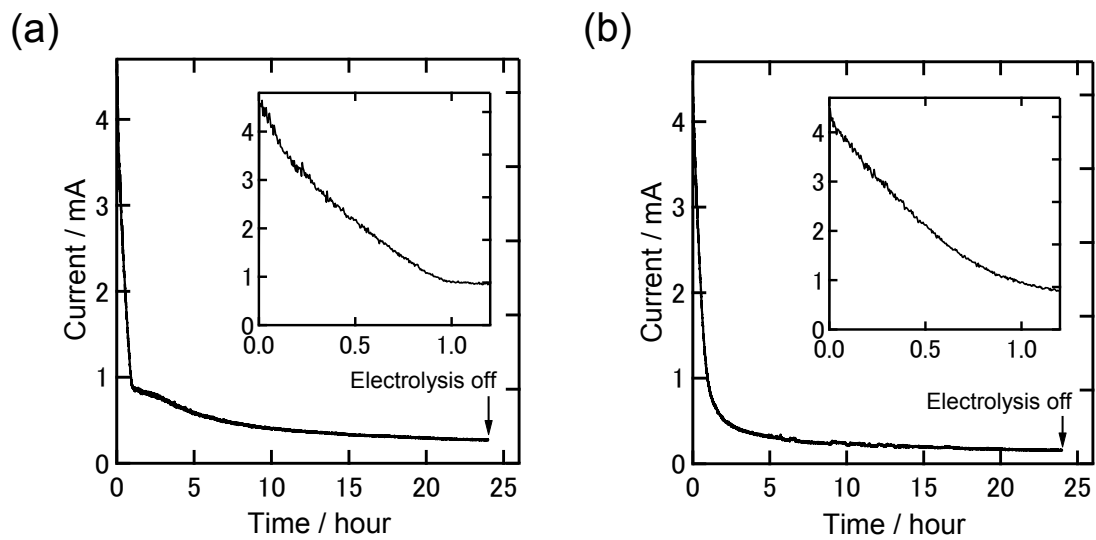

**Fig. S5.** Time courses of current during bulk electrolysis using **Re-DMF<sup>+</sup>** (0.5 mM) at  $-1.82$  V in a DMF solution containing  $\text{Et}_4\text{NBF}_4$  (0.1 M) under (a) 100% and (b) 1%  $\text{CO}_2$  atmospheres ( $10 \text{ mL min}^{-1}$ ).

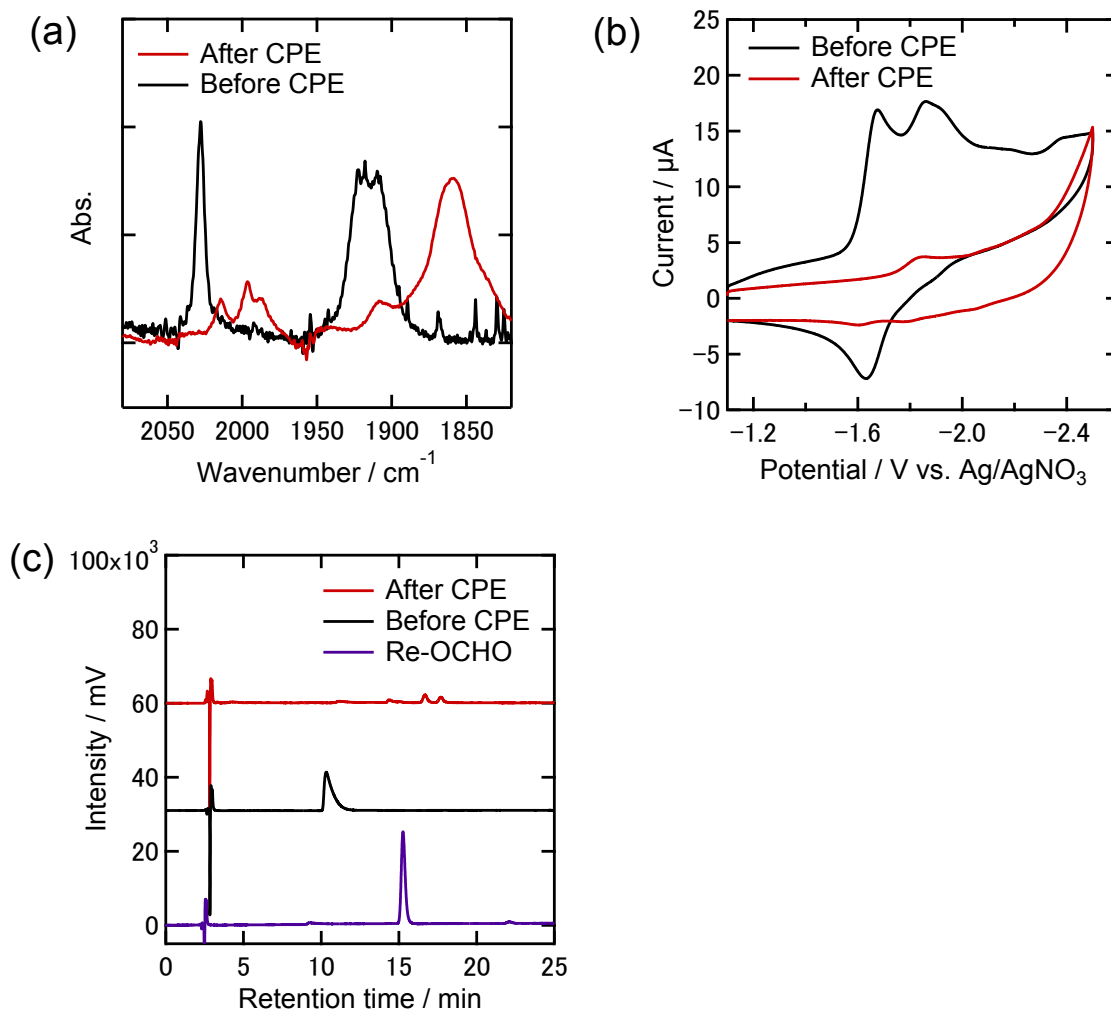

**Fig. S6.** (a) FT-IR spectra, (b) CVs, and (c), UHPLCs of the Re(I) complexes before and after the bulk electrolysis at -1.82 V under a 1% CO<sub>2</sub> atmosphere in DMF containing Et<sub>4</sub>NBF<sub>4</sub> (0.1 M) as supporting electrolyte; black lines: before electrolysis, and red lines: after electrolysis. The blue line in (c) is UHPLC of **Re-OCHO**. The FT-IR spectra and CVs were measured by using the reaction solutions without any treatment. UHPLC: an ODS column:  $\lambda_{\text{det}} = 400$  nm, a MeOH-H<sub>2</sub>O mixed solution containing KH<sub>2</sub>PO<sub>4</sub> buffer of pH5.9 (1:1 v/v) was used as the eluent. The blue line shows the analysis result of the isolated **Re-OCHO** as reference.

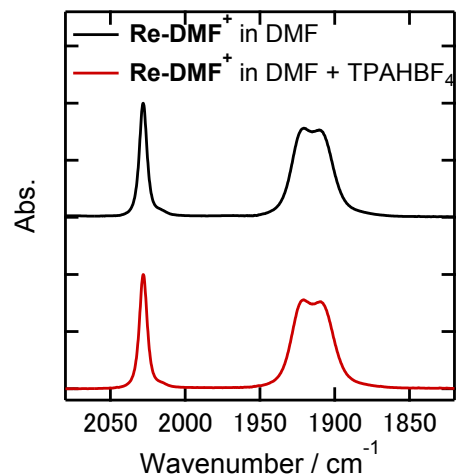

**Fig. S7.** FT-IR spectra (black) before and (red) after adding TPAHBF<sub>4</sub> (25 mM) into a DMF solution containing **Re-DMF<sup>+</sup>** (5.0 mM) and Et<sub>4</sub>NBF<sub>4</sub> (0.1 M) under an Ar atmosphere.

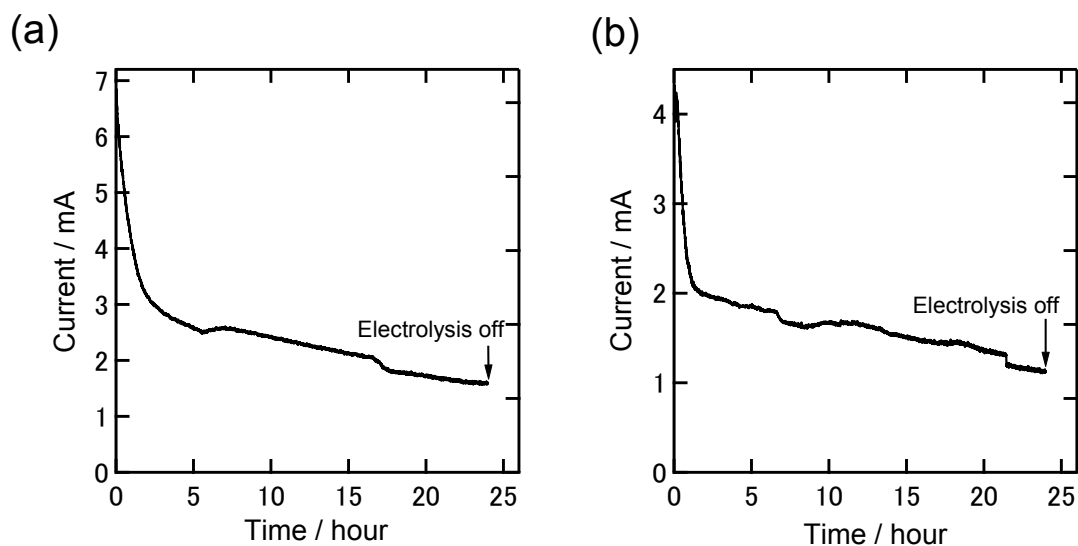

**Fig. S8.** Time courses of current during bulk electrolysis using **Re-DMF<sup>+</sup>** (0.5 mM) at  $-1.82$  V in the DMF solution containing Et<sub>4</sub>NBF<sub>4</sub> (0.1 M) and TPAHBF<sub>4</sub> (25 mM) under (a) 100% and (b) 1% CO<sub>2</sub> atmospheres (10 mL min<sup>-1</sup>).

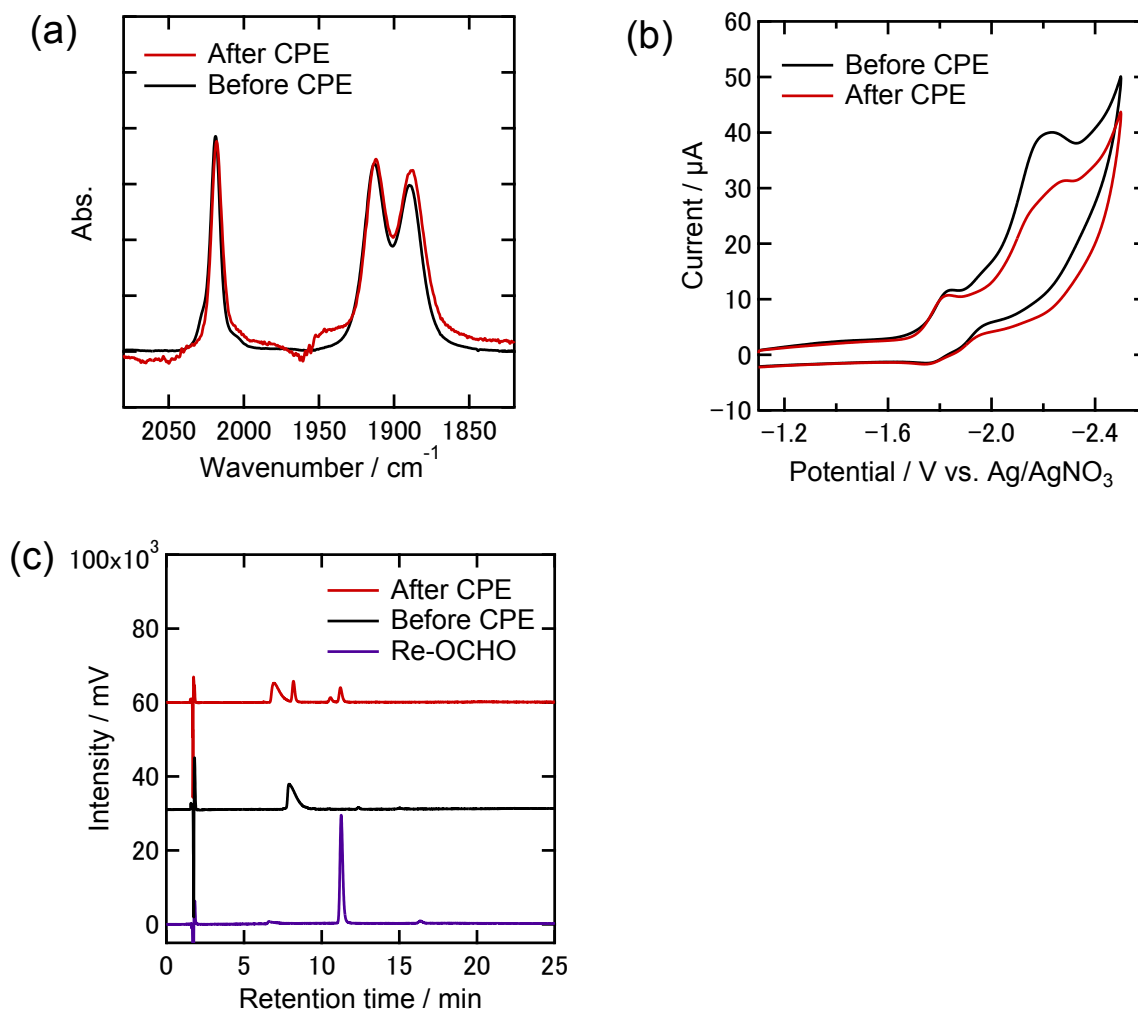

**Fig. S9.** (a) FT-IR spectra, (b) CVs, and (c), UHPLCs of the Re(I) complexes before and after the bulk electrolysis at -1.82 V under a 10% CO<sub>2</sub> atmosphere a DMF-TEOA mixed solution (5:1 v/v) containing Et<sub>4</sub>NBF<sub>4</sub> (0.1 M) as supporting electrolyte; black lines: before electrolysis, and red lines: after electrolysis. The blue line in (c) is UHPLC of **Re-OCHO**. The FT-IR spectra and CVs were measured by using the reaction solutions without any treatment. UHPLC: an ODS column:  $\lambda_{\text{det}} = 400$  nm, a MeOH-H<sub>2</sub>O mixed solution containing KH<sub>2</sub>PO<sub>4</sub> buffer of pH5.9 (1:1 v/v) was used as the eluent. The blue line shows the analysis result of the isolated **Re-OCHO** as reference.
